# Supplementary material for: A Baseline for Cross-Database 3D Human Pose Estimation
Source: MDPI journal article supplement (doi:10.3390/s21113769), 2021-05-28
Supplement: s1 [file s1]

# A Baseline for Cross-Database 3D Human Pose Estimation

## Supplemental Material

Michał Rapczyński, Philipp Werner, Sebastian Handrich, and Ayoub Al-Hamadi

**Table S1. Errors with original vs harmonized joints** (Procrustes errors in mm, mean  $\pm$  std. deviation) corresponding to Table 7.

| Training Data                 | HE1            | Test Data H36M  | PAN            |
|-------------------------------|----------------|-----------------|----------------|
| original joints (mean 65.8)   |                |                 |                |
| HE1                           | 59.0 $\pm$ 1.1 | 119.6 $\pm$ 3.9 | 99.0 $\pm$ 3.5 |
| H36M                          | 68.2 $\pm$ 1.3 | 47.6 $\pm$ 0.3  | 54.5 $\pm$ 1.1 |
| PAN                           | 59.2 $\pm$ 0.4 | 58.2 $\pm$ 0.2  | 27.2 $\pm$ 0.3 |
| harmonized joints (mean 65.1) |                |                 |                |
| HE1                           | 58.0 $\pm$ 1.1 | 117.9 $\pm$ 3.4 | 98.2 $\pm$ 3.5 |
| H36M                          | 67.2 $\pm$ 1.3 | 47.4 $\pm$ 0.3  | 54.1 $\pm$ 1.2 |
| PAN                           | 58.3 $\pm$ 0.4 | 57.2 $\pm$ 0.2  | 27.1 $\pm$ 0.3 |
| mean error change             |                |                 |                |
| HE1                           | -1.7%          | -1.4%           | -0.8%          |
| H36M                          | -1.4%          | -0.4%           | -0.8%          |
| PAN                           | -1.5%          | -1.6%           | -0.3%          |

*onesided paired-sample t-test p=0.001*

**Table S2. Errors with reduced vs full camera set** (Procrustes errors in mm, mean  $\pm$  std. deviation) corresponding to Table 8.

| Training Data                  | HE1            | Test Data H36M  | PAN             |
|--------------------------------|----------------|-----------------|-----------------|
| reduced camera set (mean 75.1) |                |                 |                 |
| HE1                            | 60.5 $\pm$ 0.2 | 136.5 $\pm$ 6.5 | 128.0 $\pm$ 3.7 |
| H36M                           | 83.9 $\pm$ 8.9 | 52.1 $\pm$ 0.6  | 66.5 $\pm$ 5.2  |
| PAN                            | 59.8 $\pm$ 0.4 | 61.9 $\pm$ 0.9  | 27.0 $\pm$ 0.2  |
| full camera set (mean 65.1)    |                |                 |                 |
| HE1                            | 58.0 $\pm$ 1.1 | 117.9 $\pm$ 3.4 | 98.2 $\pm$ 3.5  |
| H36M                           | 67.2 $\pm$ 1.3 | 47.4 $\pm$ 0.3  | 54.1 $\pm$ 1.2  |
| PAN                            | 58.3 $\pm$ 0.4 | 57.2 $\pm$ 0.2  | 27.1 $\pm$ 0.3  |
| mean error change              |                |                 |                 |
| HE1                            | -4.0%          | -13.7%          | -23.2%          |
| H36M                           | -19.9%         | -9.1%           | -18.6%          |
| PAN                            | -2.6%          | -7.5%           | 0.6%            |

*onesided paired-sample t-test p=0.008*

**Table S3. Error with and without scale normalization** (no-alignment errors in mm, mean  $\pm$  std. deviation) corresponding to Table 9.

| Training Data                        | HE1            | Test Data H36M  | PAN             |
|--------------------------------------|----------------|-----------------|-----------------|
| no scale normalization (mean 75.1)   |                |                 |                 |
| HE1                                  | 58.0 $\pm$ 1.1 | 117.9 $\pm$ 3.4 | 98.2 $\pm$ 3.5  |
| H36M                                 | 67.2 $\pm$ 1.3 | 47.4 $\pm$ 0.3  | 54.1 $\pm$ 1.2  |
| PAN                                  | 58.3 $\pm$ 0.4 | 57.2 $\pm$ 0.2  | 27.1 $\pm$ 0.3  |
| with scale normalization (mean 60.8) |                |                 |                 |
| HE1                                  | 56.8 $\pm$ 0.7 | 103.1 $\pm$ 2.2 | 100.3 $\pm$ 2.3 |
| H36M                                 | 60.4 $\pm$ 0.6 | 41.3 $\pm$ 0.2  | 48.5 $\pm$ 0.9  |
| PAN                                  | 54.1 $\pm$ 0.8 | 54.9 $\pm$ 0.2  | 28.1 $\pm$ 0.3  |
| mean error change                    |                |                 |                 |
| HE1                                  | -2.0%          | -12.6%          | 2.1%            |
| H36M                                 | -10.1%         | -12.7%          | -10.3%          |
| PAN                                  | -7.2%          | -4.1%           | 3.7%            |

*onesided paired-sample t-test p=0.018*

**Table S4. Error of multi-database training with and without scale normalization** (Procrustes errors in mm, mean  $\pm$  std. deviation) corresponding to Table 11.

| Training Data                        | HE1            | Test Data H36M  | PAN             |
|--------------------------------------|----------------|-----------------|-----------------|
| no scale normalization (mean 55.3)   |                |                 |                 |
| H36M + PAN                           | 56.0 $\pm$ 0.5 | 46.9 $\pm$ 0.2  | 27.7 $\pm$ 0.2  |
| HE1 + PAN                            | 60.4 $\pm$ 0.6 | 60.2 $\pm$ 2.2  | 29.2 $\pm$ 1.2  |
| HE1 + H36M                           | 69.4 $\pm$ 2.1 | 51.8 $\pm$ 0.7  | 57.6 $\pm$ 2.0  |
| with scale normalization (mean 47.9) |                |                 |                 |
| H36M + PAN                           | 50.7 $\pm$ 0.3 | 44.6 $\pm$ 0.3  | 28.6 $\pm$ 0.2  |
| HE1 + PAN                            | 54.8 $\pm$ 0.4 | 55.9 $\pm$ 0.9  | 28.7 $\pm$ 0.3  |
| HE1 + H36M                           | 66.0 $\pm$ 1.2 | 46.3 $\pm$ 1.1  | 55.8 $\pm$ 0.7  |
| HE1                                  | 56.8 $\pm$ 0.7 | 103.1 $\pm$ 2.2 | 100.3 $\pm$ 2.3 |
| H36M                                 | 60.4 $\pm$ 0.6 | 41.3 $\pm$ 0.2  | 48.5 $\pm$ 0.9  |
| PAN                                  | 54.1 $\pm$ 0.8 | 54.9 $\pm$ 0.2  | 28.1 $\pm$ 0.3  |
| mean error change                    |                |                 |                 |
| H36M + PAN                           | -9.4%          | -4.9%           | 3.4%            |
| HE1 + PAN                            | -9.3%          | -7.2%           | -1.5%           |
| HE1 + H36M                           | -4.9%          | -10.4%          | -3.1%           |

*onesided paired-sample t-test p=0.002*
